1  
2  
3  
4  
5  
6  
7  
8  
9  
10  
11  
12  
13  
14  
15  
16  
17  
18  
19  
20  
21  
22

# **Hemagglutination Inhibition (HAI) Antibody Landscapes after Vaccination with diverse H7 hemagglutinin (HA) proteins**

Hyesun Jang<sup>1</sup>, and Ted M Ross<sup>1,2</sup>

<sup>1</sup>Center for Vaccines and Immunology, <sup>2</sup>Department of Infectious Diseases

University of Georgia, Athens, GA, USA

#To whom correspondence shall be addressed:

Short title: Antigenic landscape of H7 HAs between 2000-2020

Abstract: 213 words

Main text: 6452 words

Running Title: Development of vaccines against H7Nx influenza viruses

Keywords: antibodies, vaccines, antigenicity, hemagglutinin, H7

**Abstract (maximum 250 words)**

23 **Background:** A systemic evaluation of the antigenic differences of the H7 influenza hemagglutinin (HA)  
24 proteins, especially for the viruses isolated after 2016, are limited. The purpose of this study was to  
25 investigate the antigenic differences of major H7 strains with an ultimate aim to discover H7 HA proteins  
26 that can elicit protective receptor-blocking antibodies against co-circulating H7 influenza strains.

27 **Method:** A panel of nine H7 influenza strains were selected from 3,633 H7 HA amino acid sequences  
28 identified over the past two decades (2000-2018). The sequences were expressed on the surface of virus  
29 like particles (VLPs) and used to vaccinate C57BL/6 mice. Serum samples were collected and tested for  
30 hemagglutination-inhibition (HAI) activity. The vaccinated mice were challenged with lethal dose of H7N9  
31 virus, A/Anhui/1/2013.

32 **Results:** VLPs expressing the H7 HA antigens elicited broadly reactive antibodies each of the selected H7  
33 HAs, except the A/Turkey/Italy/589/2000 (Italy/00) H7 HA. A putative glycosylation due to an A169T  
34 substitution in antigenic site B was identified as a unique antigenic profile of Italy/00. Introduction of the  
35 putative glycosylation site (H7 HA-A169T) significantly altered the antigenic profile of HA of the  
36 A/Anhui/1/2013 (H7N9) strain.

37 **Conclusion:** This study identified key amino acid mutations that result in severe vaccine mismatches for  
38 future H7 epidemics. Future universal influenza vaccine candidates will need to focus on viral variants with  
39 these key mutations.

40

41

42

43

44

## 1 **Introduction**

2 Avian-origin influenza A hemagglutinin subtype 7 viruses (H7 AI viruses) circulate primarily in  
3 avian hosts. Humans are dead-end hosts for these virus infections and the H7 epidemics rarely persist  
4 among humans. However, some H7 influenza viruses may mutate in the human respiratory track and cause  
5 severe recurring epidemics (1). There have been six epidemics caused by Asian H7N9 influenza viruses  
6 between 2013-2018 and this raises concern that this subtype may have the potential to cause influenza virus  
7 pandemics (2-4). H7N2 influenza viruses caused epidemics in 2002 and 2003 and silently circulated among  
8 feline species and/or unknown reservoirs for fourteen years (5). In the northeastern U.S., H7N2 influenza  
9 viruses have high affinity for the mammalian respiratory tract and are highly adapted to mammalian species  
10 with increased affinity toward  $\alpha$ 2-6 linked sialic acid (6). In 2016, the feline H7N2 influenza viruses  
11 resulted the transmission from shelter cats to an attending veterinarian(7). Even without adaptation, H7  
12 influenza virus strains have caused at least five human epidemics since 2000: 1) the H7N1 influenza viruses  
13 infected people in Italy, 2) the H7N2 influenza viruses infected people in Northeastern U.S., 3) two distinct  
14 H7N3 influenza viruses infected people in North American and Eurasian countries, 4) one H7N4 infection  
15 case in China in 2018, and people in Europe were infected with H7N7 influenza viruses (8). These  
16 epidemics warrant that another avian influenza virus of the H7 subtype may infect and begin transmitting  
17 between humans to initiate the next H7 influenza virus pandemic.

18 For prompt production and distribution of vaccines during a pandemic emergency, the World  
19 Health Organization (WHO) has stockpiled candidate vaccine viruses (CVVs) for all H7 influenza viruses  
20 (9). However, the antigenic differences of stockpiled CVVs have not been investigated, especially for the  
21 H7N9 viruses isolated after 2016 (10). To prepare for the next H7 influenza virus epidemics, it is imperative  
22 to identify the antigenic differences of co-circulating H7 HA proteins and clarify the target coverage by the  
23 antigen.

24 There have been a small number of studies that investigated the antigenic differences of multiple H7 strains.  
25 Vaccination with divergent H7 HA immunogens isolated in 2009 from North American or Eurasian H7Nx

26 viruses elicit immune responses that protect against Asian H7N9 influenza viruses (11). Anti-H7 HA  
27 antiserum recovered from humans vaccinated with A/Anhui/1/13 H7 HA recombinant protein has broad  
28 binding activity to diverse H7 strains, including A/feline/New York/16-040082-1/2016 (H7N2) and to H7  
29 HA from the A/turkey/Indiana/16-001403-1/2016 (H7N8) virus (12). There were strong two-way cross-  
30 reactivity among H7N9, H7N2, H7N3 and H7N7 influenza viruses (13). However, it is difficult to draw  
31 conclusions about the overall antigenic differences of co-circulating H7 influenza strains since each study  
32 used different representative reference strains and used antigens in different formats. In addition, these H7  
33 HA antigens were isolated prior to 2016 and did not represent the current H7 HA variants. In this study, we  
34 aimed to investigate the antigenic differences of H7 influenza HA proteins that co-circulated in human over  
35 the last two decades. Overall study design was summarized in Fig. 1

36

37 **Figure 1. Study design.** Genetic analyses was performed to select representative H7 strains  
38 between 2000 and 2020. Selected H7 HA sequences were expressed as virus like particles (VLPs)  
39 and subjected for the antigenic landscape analysis. Since it was not plausible to conduct cross-  
40 challenge studies across all seven viruses, cross-HAI assay was chosen for the antigenic  
41 landscaping. The HAI cut-off for protection was determined based on a mouse challenge study,  
42 which was described in prior to the cross-HAI titer analysis. A mutagenesis study was followed to  
43 identify the critical mutation responsible for major antigenic changes

44

## 45 **Materials and Methods**

### 46 **Alignment of HA amino acids sequences and virus like particle preparation**

47 The H7 HA amino acid sequences uploaded on Global Initiative on Sharing All Influenza virus  
48 Data (GISAID) from 2000 to 2020 were downloaded. The sequences were aligned using Geneious software  
49 (Auckland, New Zealand). The amino acids 20-300 (HA1) region were extracted and partial or duplicate  
50 sequences were eliminated. The sequences were divided into three time periods/searches (2000-2012, 2013-  
51 2020 and 2013-2020 non-H7N9 sequences). The trimmed HA1 sequences of each group was aligned using  
52 the MUSCLE algorithm and clustered by 97% identity. Each cluster was illustrated as a pie chart using  
53 PRISM GraphPad Software (San Diego, CA, USA) and a panel of nine H7 strains of each cluster was  
54 selected.

55 Total of nine H7 HA sequences were expressed on the surface of virus like particles (VLPs), as  
56 previously described (14). Briefly, the full-length H7 HA amino acid sequences were subjected to codon  
57 optimization for expression in a human cell line (Genewiz, Washington, DC, USA) and inserted into the  
58 pTR600 expression vector. The plasmid encoding H7 HA were transiently co-transfected (Lipofectamine™  
59 3000, Thermo Fisher Scientific, Waltham, MA USA) with plasmids expressing HIV-1 Gag (optimized for  
60 expression in mammalian cells; Genewiz, Washington, DC, USA), NA (A/Thailand/1(KAN-1)/2004 H5N1)  
61 (optimized for expression in mammalian cells; Genewiz, Washington, DC, USA). The cells were incubated  
62 for 72 h at 37°C (Medigen Inc., Rockville, MD, USA). Supernatant was centrifuged in low speed and  
63 filtrated through a 0.22-µm sterile filter. Filtered supernatant was purified via ultracentrifugation (100,000  
64 g through 20% glycerol, weight per volume) for 4h at 4°C. The pellets were subsequently resuspended in  
65 PBS (pH 7.2) and stored in single-use aliquots at 4°C until use.

66 The HA content of H7 VLPs was determined as previously described with slight modification (15).  
67 Briefly, A high-affinity, 96-well flat bottom enzyme-linked immunosorbent assay (ELISA) plate was  
68 coated with 5 to 10 µg of total protein of VLPs and serial dilutions of a recombinant H7 antigen

69 (A/Anhui/1/2013 HA generated in house) in ELISA carbonate buffer (50 mM carbonate buffer, pH 9.5),  
70 and the plate was incubated overnight at 4°C. The next morning, plates were washed in PBS with 0.05%  
71 Tween 20 (PBST), and then nonspecific epitopes were blocked with 1% bovine serum albumin (BSA) in  
72 PBST solution for 1 h at room temperature (RT). Buffer was removed, and then stalk-specific group 2  
73 antibody (CR8020) was added to the plate and incubated for two hours at 37°C. Plates were washed and  
74 probed with goat anti-human IgG horseradish peroxidase-conjugated secondary antibody at a 1:3000  
75 dilution and incubated for 2 h at 37°C. Plates were washed 7 times with the wash buffer prior to  
76 development with 100 µL of 0.1% 2,2'-azino-bis(3-ethylbenzothiazoline-6 -sulphonic acid; ABTS)  
77 solution with 0.05% H<sub>2</sub>O<sub>2</sub> for 40 min at 37°C. The reaction was terminated with 1% (w/v) sodium dodecyl  
78 sulfate (SDS). Colorimetric absorbance at 414 nm was measured using a PowerWaveXS (Biotek, Winooski,  
79 VT, USA) plate reader. Background was subtracted from negative wells. Linear regression standard curve  
80 analysis was performed using the known concentrations of recombinant standard antigen to estimate the  
81 HA content in VLP lots.

82

### 83 **Mouse study**

84 C57BL/6 mice (*Mus musculus*, females, 6 to 8 weeks old) were purchased from Jackson Laboratory  
85 (Bar Harbor, ME, USA) and housed in microisolator units. The mice were allowed free access to food and  
86 water and were cared for under USDA guidelines for laboratory animals. All procedures were reviewed  
87 and approved by the Institutional Animal Care and Use Committee (IACUC). Mice (8 mice per group) were  
88 intramuscularly injected twice at four-week intervals with each VLPs (HA content=3 µg) with AddaVax™  
89 adjuvant (Invivogen, San Diego, CA, USA) (Figure 2). Mice were bled at week 8. Mice were transferred  
90 to a biosafety level 3 (BSL-3) facility at the earliest availability (week 12). For viral challenge, mice were  
91 briefly anesthetized and infected with a 100 LD<sub>50</sub> dose of A/Anhui/1/2013 H7N9 via intranasal route (1X10<sup>3</sup>  
92 PFU/0.05 ml) (Figure 2). At 4 days post-challenge, three mice in each group were randomly selected and  
93 sacrificed to harvest lung tissue (Figure 2). Remaining mice were monitored for the weight loss and

94 euthanized at 14 days post-challenge (Figure 2). Weight loss more than 25% was used as a primary  
95 measurement for determination of humane endpoint. Also, dyspnea, lethargy, response to external stimuli  
96 and other respiratory distress was closely monitored for the determination of human endpoint.

97 All procedures were in accordance with the NRC Guide for Care and Use of Laboratory Animals,  
98 the Animal Welfare act, and the CDC/NIH Biosafety and Microbiological and Biomedical Laboratories  
99 (IACUC number A2017 11-021-Y3-A11).

100

### 101 **Hemagglutination-Inhibition (HAI) assay**

102 To evaluate the humoral response to each vaccination, blood was collected via submandibular  
103 bleeding using a lancet and transferred to a microfuge tube. Tubes were incubated at room temperature for  
104 at least 30 min prior to centrifugation, sera were collected and frozen at  $-20\text{ }^{\circ}\text{C} \pm 5\text{ }^{\circ}\text{C}$ . A hemagglutination  
105 inhibition assay (HAI) assay was used to assess receptor-blocking antibodies to the HA protein to inhibit  
106 agglutination of turkey red blood cells (TRBCs). The protocol is taken from the CDC laboratory influenza  
107 surveillance manual. To inactivate non-specific inhibitors, mouse sera was treated with receptor destroying  
108 enzyme (RDE, Denka Seiken, Co., Japan) prior to being tested. Three parts of RDE was added to one-part  
109 sera and incubated overnight at  $37^{\circ}\text{C}$ . The RDE was inactivated at  $56^{\circ}\text{C}$  for 30 min; when cooled, 6 parts  
110 of sterile PBS was added to the sera and was kept at  $4\text{ }^{\circ}\text{C}$  until use. RDE treated sera was two-fold serially  
111 diluted in v-bottom microtiter plates. Twenty-five  $\mu\text{L}$  of VLPs or virus at 8 HAU/50  $\mu\text{L}$  was added to each  
112 well (4 HAU/25  $\mu\text{L}$ ). Plates were covered and incubated with virus for 20 min at room temperature before  
113 adding 0.8% TRBCs in PBS. The plates were mixed by agitation and covered; the RBCs were then allowed  
114 to settle for 30 min at room temperature. HAI titer was determined by the reciprocal dilution of the last well  
115 which contained non-agglutinated RBC. Negative (serum from naïve mouse) and positive serum controls  
116 (serum from H7 VLPs vaccinated mouse from previous study; data not shown) were included for each

117 plate. All mice were negative (HAI < 1:10) for pre-existing antibodies to currently circulating human  
118 influenza viruses prior to study onset.

119

## 120 **Plaque forming assay (PFA)**

121 Viral titers were determined using a plaque forming assay using  $1 \times 10^6$  Madin-Darby Canine  
122 Kidney (MDCK) cells, as previously described (16). Briefly, lung samples collected at 4 days post  
123 challenge were snapped frozen and kept at  $-80^\circ\text{C}$  until processing. Lungs were serially diluted ( $10^0$  to  $10^5$ )  
124 with sterilized phosphate buffered saline (PBS) and overlaid onto confluent MDCK cell layers for 1 h in  
125 200  $\mu\text{l}$  of DMEM supplemented with penicillin–streptomycin. Cells were washed after 1-hour incubation  
126 and DMEM was replaced with 3 mL of 1.2% Avicel (FMC BioPolymer; Philadelphia, PA) - MEM media  
127 supplemented with  $1\mu\text{g/mL}$  TPCK-treated trypsin. After 48 h incubation at  $37^\circ\text{C}$  with 5%  $\text{CO}_2$ , the overlay  
128 was removed and washed 2x with sterile PBS, cells were fixed with 10% buffered formalin and stained for  
129 15 mins with 1% crystal Violet. Cells were washed with tap water and allowed to dry. Plaques were counted  
130 and the plaque forming units calculated (PFU/mL).

131

## 132 **Determination of HAI cut-off to predict protection against challenge.**

133 The receiver operating characteristic (ROC) curve analysis between HAI titer and protection  
134 against Anhui/13 challenge, as previously described(17). The protection was defined when the mouse could  
135 maintain 95% of the original body weight during entire challenge study. The sensitivity and specificity of  
136 four cut-off values (VLP HAI titer=40, 80, 160, and 320) to predict protection were analyzed. The sensitivity  
137 was calculated as “number of mouse which showed hemagglutination inhibition (HAI) titer  $\geq$  cut-off and  
138 was protected from the challenge study/ number of all protected mice”. The Specificity was calculated as  
139 “number of mouse which showed hemagglutination inhibition (HAI) titer < cut-off and unprotected from  
140 the challenge study/ number of all unprotected mice”. The ROC curve was generated by connecting plots



141 of sensitivity% versus 100-specificity% (false positive). The area under the curve (AUC) and Youden's  
142 index (Sensitivity + Specificity -1) was calculated by Prism (Graphpad software). The optimal cut-off was  
143 determined based on highest AUC or Youden's index to be used as a surrogate of protection.

144

#### 145 **Site directed mutagenesis.**

146 The H7 HA numbering was based on a previous report(18). The amino acids at residues 167 to 170  
147 were changed from NAAF to NATF in the putative antigenic site B of A/Anhui/1/2013 H7N9 HA. The  
148 NATF amino acids are located at this position in the A/Turkey/Italy/589/2000 H7N1 HA molecules. By the  
149 single amino acid substitution, it is expected to introduce N-glycosylation site to the antigenic site B, located  
150 nearby the receptor binding site. The site directed mutagenesis was conducted with QuikChange II Site-  
151 Directed Mutagenesis Kit (Agilent, Santa Clara, CA, United States) in accordance with the manufacturer's  
152 instructions. The Primer3 program (v. 0.4.0) was used to design mutagenesis primers. The plasmid was  
153 expressed as VLPs as described above.

154 The Anhui/13 A169T H7 VLP was used to immunize eight C57B/L6 mice at day 0 and week 4.  
155 We measured the antigenic breath of the antisera collected at week 8. At week 8, all mice were challenged  
156 with Anhui/13 H7N9 wild type virus, as described above, and looked for weight loss, survival, and lung  
157 viral titer at 4 days-post-challenge.

158

#### 159 **Statistical analysis.**

160 The difference in serum HAI titer and lung viral titer among groups was analyzed by ordinary one-  
161 way ANOVA, followed by Tukey's multiple comparison test. The difference in body weight loss of each  
162 time point was tested by Repeated Measures one-way ANOVA followed by Tukey's multiple comparison  
163 test. All statistical analysis was performed using Prism GraphPad Software.

164 **Results**

165 **Phylogenetic analysis of H7Nx viruses isolated between 2000 and 2018**

166 Among the 3,691 amino acid sequences uploaded to GISAID, almost half of the sequences (1740)  
167 showed 97% or higher HA1 amino acid similarity to A/Anhui/1/2013 H7N9 virus (Anhui/13-like). The  
168 uploaded amino acid sequences were biased to isolates from Asian H7N9 epidemics between 2013-2017.  
169 Since the Anhui/13-like sequences skewed the overall phylogenetic analysis, the sequences were separately  
170 aligned in three ways: 1) sequences isolated between 2000-2012 before the emergence of Asian H7N9 (Fig.  
171 2A), 2) H7N9 sequences isolated from 2013-2020 (Fig. 2B), and non-H7N9 sequences isolated from 2013-  
172 2020 (Fig. 2C).

173

174 **Figure 2. Frequencies of influenza HA clusters in 2000 and 2018.** Total of 3633 Influenza HA  
175 sequences uploaded between 2000 and 2018 in GISAID databases were aligned to understand how  
176 the H7Nx viruses evolved. Due to the overwhelming number of Anhui/13-like viruses during Asian  
177 H7N9 epidemics, the pie chart analysis was separately conducted on sequences isolated before and  
178 after 2013 Asian H7N9 epidemics (A and B). The non-Asian H7N9 sequences isolated after 2013-  
179 2018 were further analyzed as a separate pie (C). The aligned sequences were clustered by 3%  
180 amino acid similarity and dissected into each pie. The viruses to represent each pie were chosen  
181 from WHO candidate vaccine viruses.

182

183 Prior to the Asian H7N9 influenza virus outbreaks, the Eurasian and North American lineages  
184 represented the majority of H7 HA sequences in the database (53.14% and 45.95%, respectively) (Fig. 2A).  
185 Interestingly, most of the Eurasian H7Nx influenza viruses isolated between 2000 to 2020, had high HA  
186 amino acid similarity (95% or more) to the oldest strain in our panel, A/Mallard/Netherlands/12/2000 H7N3  
187 (Table 1). Instead of a slow drift of HA1 amino acid sequences, genetic diversification of the H7Nx  
188 influenza viruses was driven by genetic reassortment that resulted in each cluster sharing unique

189 neuraminidase subtypes (N1, N3, N7, N9). The North American lineage influenza viruses isolated between  
 190 2000-2012 were further subdivided into two distinct clusters that shared 92.5% amino acid similarity to  
 191 each other (green and yellow segments in Fig. 2A). During this 12-year period, the North American H7N3  
 192 influenza viruses had less genetic drift (<3%) and did not evolve into divergent subtypes. The North  
 193 American H7N2 influenza viruses spiked only in epidemics in early 2000s (2000-2003) and were not  
 194 detected thereafter.

195 **Table1. Selected panel strains**

| Panel strains<br>(full name)                            | GISAID<br>Accession<br>number | Amino acids homology (%) |          |          |              |          |            |         |             |
|---------------------------------------------------------|-------------------------------|--------------------------|----------|----------|--------------|----------|------------|---------|-------------|
|                                                         |                               | Shanghai/13              | Anhui/13 | Hunan/13 | Guangdong/16 | Italy/00 | Jiangxi/09 | Ohio/04 | New York/03 |
| <b>Shanghai/13</b><br>(A/Shanghai/1/2013 H7N9)          | EPI744956                     | -                        |          |          |              |          |            |         |             |
| <b>Anhui/13</b><br>(A/Anhui/1/2013 H7N9)                | EPI439507                     | 98.39                    | -        |          |              |          |            |         |             |
| <b>Hunan/16</b><br>(A/Hunan/02650/2016 H7N9)            | EPI961191                     | 96.79                    | 98.22    | -        |              |          |            |         |             |
| <b>Guangdong/16</b><br>(A/Guangdong/17SF003/2016 H7N9)  | EPI919607                     | 95.39                    | 96.63    | 97.17    | -            |          |            |         |             |
| <b>Italy/00</b><br>(A/Turkey/Italy/589/2000 H7N1)       | EPI485603                     | 95.54                    | 95.54    | 94.83    | 93.09        | -        |            |         |             |
| <b>Jiangxi/09</b><br>(A/Duck/Jiangxi/3230/2009 H7N9)    | EPI505699                     | 96.43                    | 96.43    | 95.01    | 93.62        | 97.14    | -          |         |             |
| <b>Ohio/04</b><br>(A/Blue-wingeteal/Ohio/658/2004 H7N3) | EPI229595                     | 84.82                    | 84.82    | 83.76    | 83.51        | 84.82    | 86.07      | -       |             |
| <b>New York/03</b><br>(A/New York/107/2003 H7N2)        | EPI141612                     | 81.61                    | 81.96    | 81.08    | 80.32        | 81.25    | 81.96      | 92.50   | -           |

196  
 197 The majority of viral sequences isolated from 2013-2020 were Anhui/13-like H7N9 influenza  
 198 viruses (Fig. 2B). Approximately 5.12% of the HA1 sequences had 3-5% difference in the amino acid  
 199 sequence and represented as a separate clusters from Anhui/13-like HA sequences (Fig. 2B). This small

200 cluster of HA sequences consisted of the A/Guangdong/17SF003/2016 H7N9 (Guangdong/16)-like viruses,  
201 which evolved from Anhui/13 and clustered into a separate lineage in 2016-2017. Another separate  
202 phylogenetic cluster of Asian H7N9 viruses was the A/Shanghai/1/13 H7N9 (Shanghai/13)-like viruses.  
203 The Shanghai/13 was one of the earliest human H7N9 isolates in spring 2013, which evolved into a separate  
204 phylogenetic cluster from Anhui/13-like viruses (19, 20). In this sequence analysis, the Shanghai/13 virus  
205 itself belonged to Anhui/13-like virus due to high homology (98.39%) of the HA amino acid sequences.  
206 However, the derivatives of Shanghai/13 had divergent sequences to form a separate cluster that occupies  
207 ~1% of the overall HA sequences (Fig. 2B).

208           The majority of non-Asian H7N9 influenza strain sequences uploaded on GSAID database between  
209 2013 and 2020 were North-American H7N3 influenza virus derivatives, which represented ~26% of the  
210 HA amino acid sequences prior to the 2013 Asian H7N9 influenza virus outbreaks (Fig. 2C). Most of the  
211 North American H7 influenza viruses were H7N3 viruses designated into four distinct HA sequence clusters.  
212 The A/American green-winged teal/CA/2015 H7N3 virus, which is the representative strain of the second  
213 largest cluster, is most likely derived from the H7N3 A/Bluewingteal/Ohio/658/2004 (Ohio/04) isolate.  
214 Interestingly, the northeastern U.S H7N2 strains have been rarely detected since 2004, except for one  
215 incident at an animal shelter in 2016 (7). There are only 10 isolates that belong to the Eurasian lineage, but  
216 this is most likely due to the sampling bias for Asian H7N9 isolated in most Asian countries during that  
217 time period. All ten isolates had high homology to the NL/00 (H7N3) influenza virus.

218

### 219 **Selection of H7 panel strains**

220           The panel of H7 influenza strains were selected to represent the antigenic diversity of H7Nx viruses  
221 during the last two decades. Asian H7N9 strains that are known to be antigenically distinct from each other  
222 were selected (9). For non-Asian H7N9 strains, three Eurasian strains and two North American strains were  
223 selected based upon remoteness in geography and time of isolation (Table 1 and Fig. 3). The amino acid  
224 difference ranged between 1.61-5.14%, among Eurasian strains despite of dispersed isolation and time

225 points of collection. The North American strains shared ~81-86% amino acid homology with Eurasian  
 226 strains. Even though the Ohio/04 and New York/03 strains were isolated within a year from geographically  
 227 similar regions, they shared 92.5% of the same HA amino acids. It was interesting that only few of  
 228 mutations were observed from the putative antigenic site of nine strains isolated during two decades (Table  
 229 2). Of note, the hallmark mutation that causes N-linked glycosylation in antigenic site B was observed from  
 230 Italy/00 (Table 2, blue-color coded and asteroid).

231 **Figure 3. Phylogenetic relations among selected H7 strains.** The phylogram based on HA1  
 232 amino acid sequences (H7 HA<sub>20-300</sub>) was constructed by Neighbor-Joining method with the boot-  
 233 strap resampling (100 replicates) using the Geneie software (Auckland, New Zealand). The  
 234 horizontal branch lengths are proportional to the number of nucleotide changes. **(A) Phylogeny of**  
 235 **all H7 HA1 amino acid sequences** Red: Asian H7N9s isolated between 2013-2020, Orange:  
 236 Eurasian H7NXs isolated between 2000-2012, Cyan: Ohio/03 H7N3-like cluster, Magenta: New  
 237 York/02-like cluster **(B) Selected panel strains** Phylogenetic trees based on HA1 amino acid  
 238 sequences of selected H7 panel strains

239 **Table2. Putative antigenic sites of selected panel strains**

| Putative antigenic site | A            | B              | E                    | B                      | D                  | E                                           | C                      |                          |
|-------------------------|--------------|----------------|----------------------|------------------------|--------------------|---------------------------------------------|------------------------|--------------------------|
| H7 numbering            | 148-153      | 160-169        | 179-183              | 197-206                | 213-229            | 268-273                                     | 284-295                |                          |
| H7 Strains              | Anhui/13     | RRSGSS         | WLLSNTDNAA           | NTRKS                  | TAEQTKLYGS         | VGSSNYQQSFVPSGAR                            | FLRGKS                 | ANCEGDC                  |
|                         | Shanghai/13  | RRSGSS         | WLLSNTDNAA           | NTRK <b>N</b>          | TAEQTKLYGS         | VGSSNYQQSFVPSGAR                            | FLRGKS                 | <b>A</b> DCEGDC          |
|                         | Hunan/16     | <b>K</b> RSRSS | WLLSNTDNAA           | NTRKS                  | TAEQTKLYGS         | VGSSNYQQSFVPSGAR                            | FLRGKS                 | ANCEGDC                  |
|                         | Guangdong/16 | RRSGSS         | WLLSNTDNAA           | NT <b>K</b> ES         | TAEQTKLYGS         | VGSSNYQQSFVPSGAR                            | FLRGKS                 | ANCEGDC                  |
|                         | Jianxi/09    | RRSGSS         | WLLSNTDNAA           | NTRK <b>D</b>          | <b>T</b> TEQTKLYGS | VGSSNYQQSFVPSGAR                            | FLRGKS                 | ANCEGDC                  |
|                         | Italy/00     | <b>K</b> RSRSS | WLLSNTDN <b>A</b> T* | NTRK <b>D</b>          | <b>N</b> TEQTKLYGS | <b>I</b> GSSNYQQSFVPSGAR                    | FLRGKS                 | ANCEGDC                  |
|                         | Ohio/04      | RRSGSS         | WLLS <b>N</b> SDNAA  | <b>N</b> PR <b>N</b> K | <b>A</b> TEQTKLYGS | <b>V</b> GSS <b>K</b> YQQSF <b>T</b> PSPGAR | <b>F</b> RG <b>E</b> S | <b>S</b> GCEGDC          |
|                         | New York/03  | <b>T</b> RSRSS | WLLS <b>N</b> SDNAA  | <b>N</b> PR <b>N</b> K | <b>V</b> SEQTKLYGS | <b>V</b> RSS <b>K</b> YQQSF <b>T</b> PNPGAR | <b>F</b> RG <b>E</b> S | <b>S</b> SCR <b>G</b> DC |

240 Difference in the amino acid from Anhui/13 was color-coded as blue

241 \*Hall mark mutation which can cause N-glycosylation

242

243 **Determination of HAI cut-off for protection**

244 Mice were vaccinated with virus-like particles expressing the panel H7 HA sequences and  
245 challenged with Anhui/13 H7N9 virus. This challenge study was conducted to determine HAI cut-off for  
246 protection. All vaccinated mice had high titer antibodies with HAI activity to the Anhui/13 H7N9 virus  
247 except those vaccinated with the NY/02 virus (Fig. 4A). The HAI titer against live Anhui/13 virus showed  
248 similar pattern, albeit with lower titers (Fig 4B). The level of cross-HAI reactivity did not directly correlate  
249 with the antigenic similarity (Table 1 and Fig. 4).

250 **Figure 4. Detection of Anhui/13 H7 HA by antisera for H7 HAs** Serum samples collected at  
251 week 8 tested for the HAI antibody response specific to A/Anhui/1/2013 H7 virus like particles  
252 (VLPs) and A/Anhui/1/2013 H7N9 virus (A and B, respectively. Individual titer was plotted and  
253 the mean value was presented as bars. Dotted line represents the lower detection limit (10 HAI unit)

254

255 Following challenge with Anhui/13, mice were observed for clinical signs and mortality (Fig. 5).  
256 To determine the protection, average body weight loss 5% or less was considered as minimal body weight  
257 loss (Dotted line in Figure 5A). Mock vaccinated mice lost greater than 15% body weight by day 7 post-  
258 infection, which was similar to mice vaccinated with NY/02 VLPs (Fig. 5A) with 60% of the mice reaching  
259 clinical endpoints and were sacrificed (Fig. 5B). Mice vaccinated with Jiangxi/09 or Guangdong/16 lost  
260 12% body weight. Mice vaccinated with the other VLPs lost between 5-8% body weights, except for mice  
261 vaccinated with Hunan/16 that maintained their average body for the entire challenge period. Most mice  
262 survived challenge (Fig. 5B). One mouse died in the Jiangxi/09 group and 2 mice died in the Guangdong  
263 /16 group. Little to no virus was detectable in the lungs of mice vaccinated with Anhui/13 or Shanghai/13,  
264 and only one mouse in the Hunan/16 group had detectable virus (Fig. 5C).

265 **Figure 5. Protection against stringent H7N9 challenge** C57BL/6 mice (8 mice/group) vaccinated  
266 with H7 VLPs at week 0 and 4 were intranasally infected with the A/Anhui/1/2013 H7N9) virus.

267 Mice were monitored daily for weight loss (A and B, respectively) and viral lung titers in selected  
268 mice at day 4 post infection (C). Weight loss and lung viral titer was presented as mean± standard  
269 deviation (A and C). \*p<0.05, \*\*p<0.01, \*\*\*p<0.001, \*\*\*\*p<0.0001

270

271 The ROC curve analysis was conducted between HAI titer and protection (body weight loss less  
272 than 5%) data following Anhui/13 challenge study (Suppl. Fig. 1). The selection of the cut-off was  
273 determined by two criteria: maximizing sensitivity (AUC of the curve) and maximized the summation of  
274 sensitivity and specificity (Youden's index) (21). The highest sensitivity of the prediction was observed as  
275 the maximum area under the curve when the VLP HAI cut-off was 1:80 (Suppl. Fig. 1B). The Youden's  
276 index (specificity + sensitivity -1) was highest when the HAI cut-off was 1:160 (Suppl. Fig. 1C). Thus, we  
277 used the range 1:80 as the cut-off of HAI titer that can provide protection against a stringent challenge by  
278 each H7 influenza virus in panel. The absolute protection is expected if the VLP HAI titer is higher than  
279 160, while HAI titer between 80-160 is expected to provide marginal protection. When applying the cut-  
280 offs determined by the ROC analyses, the pre-challenge HAI titer appears to correctly predict the level of  
281 protection in weight loss (Fig. 4A and Fig 5A) in a stringent Anhui/13 challenge.

282 **Suppl. Fig. 1. Determination of HAI cutoff using receiver operating characteristic**

283 **(ROC) curve analysis.** The plots of sensitivity% versus false positive rate (100-

284 specificity%) of each cut-off were connected to form the ROC curve. Sensitivity=

285 number of mouse which showed hemagglutination inhibition (HAI) titer  $\geq$  cut-off and

286 was protected from the challenge study/all protected mice, Specificity = number of

287 mouse which showed hemagglutination inhibition (HAI) titer < cut-off and unprotected

288 from the challenge study/ number of all unprotected mice, Youden's index = Sensitivity

289 + Specificity -1

290

## 291 **Cross-reactiveness amongst all H7 panel strains**

292 For a comparison of cross-reactive HAI activity, the cut-off 80 was also applied. The HAI  
293 antibodies elicited by each H7N9 VLPs had a broad-range of cross-reactive antibodies (Fig 6). The cross-  
294 reactivity of each antisera did not correlate with the amino acid sequence similarity of the HA (Table 1 and  
295 Fig. 6). Mice vaccinated with the four Asian H7N9 strains (Anhui/13, Shanghai/13, Guangdong/16, and  
296 Hunan/16) had cross-reactivity to each other (Fig. 6A-D), but did not recognize Jiangxi/09, Italy/00 or  
297 Ohio/04 (Fig. 6E-G). Antisera to the Jiangxi/09 or Ohio/04 showed broad cross-reactive HAI activity  
298 against all the H7 viruses in the panel, except to Italy/00 (Fig. 6). In contrast, anti-Italy/00 sera had broad  
299 HAI activity against all the viruses in the panel, except against Jiangxi/09 and Ohio/00 (Fig 6). Mice  
300 vaccinated with NY/02 VLPs elicited antibodies with HAI activity against the homologous NY/02 virus,  
301 but did not recognize any of the other H7 viruses (Fig. 6).

302 **Figure 6. Cross-reactiveness among H7 panel strains** The week 8 sera was tested for the cross-  
303 reactivity to H7 VLPs expressing HA from all eight panel strains. Individual titer was plotted.  
304 Interquartile range, median, minimum and maximum values were presented as box, middle line,  
305 upper and lower whiskers, respectively . Dotted line indicates the cut-off for the protection (80 HAI  
306 unit).

## 307 **Influence of glycosylation site**

308 With regard to the unique antigenic profile of Italy/00, we found that there was a putative  
309 glycosylation site at HA<sub>169</sub> (H7 numbering from our own sequence alignment) (Table 2). Since the location  
310 of putative *N*-linked glycosylation was located in antigenic site B, we hypothesized that glycosylation at  
311 this location may be responsible for the unique antigenic profile of Italy/00. To test the hypothesis, we  
312 introduced a mutation into the HA nucleotide sequence of Anhui/13 (HA A169T) (Fig. 7A) and looked for  
313 the change in reactivity elicited antisera by each VLP vaccine (Fig. 7B). Interestingly, the reactivity of VLP  
314 expressing the Anhui/13 HA A169T mutation elicited antibodies with a significant decrease in HAI activity  
315 against Anhui/13 and Hunan/13, but no change against the other 6 viruses (Fig. 6B). According to the



316 predicted trimeric structure (Protein data base number=4N5J), the glycosylation site appear to be located  
317 on the antigenic site B, and next to the receptor binding site (Fig. 7C).

318 **Figure 7. Alanine to Threonine mutation at HA169 resulted in significant antigenic change in**  
319 **Anhui/13 H7 HA (A) Mutagenesis to Anhui/13 H7 HA** Site directed mutation was conducted  
320 on plasmid expressing wildtype (WT) Anhui/13 HA. The mutation is expected to result in alanine  
321 to threonine substitution at HA169 (H7 numbering), primer F= forward primer, primer R= reverse  
322 primer **(B) Change of cross-reactiveness by the mutagenesis** The plasmid with mutation was  
323 expressed as virus-like particle (VLP) tested for the reactivity to anti-H7 panel sera. Individual HAI  
324 titer was plotted. The box indicates the mean± standard deviation. \*p<0.05, \*\*<0.1, dotted line:  
325 protection cut-off (80 HAI unit). **(C) Predictive location of mutation on the HA trimer** The  
326 trimeric structure of Anhui/13 H7 HA was generated using the 3D-JIGSAW algorithm, and  
327 renderings were performed using MacPyMol. The trimeric structure was based on the structure on  
328 protein data base (PDB number=4N5J). The putative antigenic site B and mutation site (H7 HA169)  
329 was shown in blue and red, respectively. Dashed circle indicates receptor binding site.

330

331 We also immunized C57B/L6 mice with the Anhui/13 A169T VLPs and looked for the antigenic  
332 breath of the antisera and protection efficacy against Anhui/13 WT H7N9 challenge (Fig. 8). Interestingly,  
333 the HAI titer to the Anhui/13 A169T VLPs (homologous antigen) was significantly lower and showed  
334 bigger standard deviation than the HAI titer to the Anhui/13 WT (Fig. 7C and 8A). The HAI activity to the  
335 Shanghai/13 VLPs was similar with the titer to the Anhui/13 A169T VLPs (Fig. 8A). High reactivity to the  
336 New York/02 VLPs (Fig. 8C), which was also observed from other antisera for all 8 panel strains (Fig. 6).  
337 The HAI reactivity to the Hunan/16, Guangdong/16, Jiangxi/09, Italy/00, and Ohio/03 H7 VLPs was  
338 significantly lower than the titer to the Anhui/13 WT and New York/02 H7 VLPs. In consistent with the  
339 high HAI titer to the Anhui/13 WT H7 VLPs, the mice were completely protected from weight loss and  
340 onset of any clinical symptom by the lethal challenge with the Anhui/13 WT H7N9 virus (Fig. 8C&D).

341 There was no detectable infectious viral titer in the lung collected at day 4 post challenge, which was clearly  
342 contrasted with the naïve control mouse (Fig. 8B).

343 **Figure 8. Immunization with Anhui/13 A169T H7 VLP** C57BL/6 mice (8 mice) was vaccinated  
344 with Anhui/169T H7 VLPs at week 0 and 4. Vaccinated mice were bled and the serum was tested  
345 for the antigenic breath across panel H7 strains (A). At week 8, vaccinated mice were intranasally  
346 infected with 10e+5 PFU of the A/Anhui/1/2013 H7N9) virus. Mice were monitored daily for  
347 weight loss and survival (C and D, respectively) and viral lung titers in selected mice at day 4 post  
348 infection (B). Weight loss and lung viral titer was presented as mean± standard deviation (A&C).  
349 \*p<0.05, \*\*\*\*p<0.0001

350

351

## 352 Discussion

353 This study investigated the antigenic differences of selected H7 panel influenza HA proteins. Since  
354 most available H7 HA sequences originated from major human infections, the selected H7 panel strains  
355 were similar with the list of candidate vaccine viruses (CVVs) from the WHO (10). There was a high  
356 similarity of amino acid sequences in the putative HA antigenic sites (Table 2). In addition, antibodies  
357 elicited by these HA antigens had HAI activity to most of these H7 viruses (Fig. 6). It was consistent with  
358 previous findings showing that broad cross-reactivity among H7 influenza viruses isolated from both North  
359 American and Eurasian countries (12, 22).

360 Before this study, Joseph et al conducted similar study with ten H7 influenza viruses isolated  
361 between 1971 and 2004 (23). The selection of panel strains was based on phylogenetic relations and  
362 geographic locations. The cross-reactive neutralizing antibody response was observed similar with our  
363 study. For example, despite of phylogenetic heterogeneity, the antisera for two H7N3 viruses isolated from  
364 American and Eurasian countries (A/chicken/Chile/4322/02 (H7N3) and A/turkey/England/63 (H7N3),  
365 respectively) were cross reactive each other. The antisera for A/turkey/VA/55/02 (H7N2) was poorly cross-  
366 reactive to other H7 viruses, while the H7N2 antigen could be recognized by other antisera. Our study  
367 extended the analyses into more recent H7 strains, and identified a major mutation which could significantly  
368 alter the antigenic profile.

369 From both our study and the work of Joseph et al, the H7N2 viruses isolated from north-eastern  
370 U.S. in early 2000 showed unique antigenic profile. In phylogenetic analysis, the H7N2 viruses were  
371 uniquely clustered from other H7 viruses due to the large truncation at the putative receptor binding site  
372 (H7 HA) (Supplementary figure 2). The unique structure of HA appear to ease the binding of antibodies  
373 from other antisera, while the antisera for the H7N2 was lack of major epitope. Meanwhile, The HAI titer  
374 against Italy/00 and Ohio/04 VLPs was observed low from all antisera, even to the homologous antisera.  
375 Only anti-Italy/00 antibodies against Italy/00 VLP were above the cut-off, and only anti-Ohio/04 antibodies  
376 against Ohio/04 VLPs were above cut-offs. It seemed that in comparison to other VLPs, the access to the

377 two VLPs were much restricted. The presence of glycosylation on the receptor binding site also  
378 significantly impair the reactivity to the homologous antisera; even the antisera collected from mice  
379 vaccinated with the Anhui/13 A169T H7 VLPs detected the Anhui/13 WT H7 VLPs better (Fig. 8A). We  
380 can explain that the Italy/00 has glycosylation site near the receptor binding site, so even homologous  
381 antisera showed relatively lower access to the VLP. We could not find plausible explanation for the Ohio/04  
382 VLPs, but suspect that the structure of Ohio/04 expressing VLP might have hindered the access of the  
383 antibodies.

384         The level of cross-HAI activity among H7 HA proteins did not follow phylogenetic similarity or  
385 geographic origin. Instead, mutations that altered the glycosylation pattern around the receptor binding site  
386 (RBS) played a critical role in shaping the antigenic profile. A single amino acid substitution (HA A169T)  
387 caused a significantly reduce the reactivity to antisera specific for Asian H7N9 strains. The mutation did  
388 not significantly influence on reactivity to other anti-sera, which suggests that such antigenic site was not  
389 dominant recognition site by such antibodies. The mutations were based on the distinctive antigenic profile  
390 of Italy/00 H7 HA. This protein has an N-linked glycosylation site (NATF) at residue 167-170 of the HA  
391 molecule (Table 2). The putative location of the *N*-glycosylation is adjacent to the receptor binding site of  
392 the trimeric form of HAs (Fig. 6C). Spontaneous occurrence of the N-linked glycosylation sites at the same  
393 location in H7 HA proteins was previously reported during the H7N1 epidemics in Italy in the early 2000's  
394 (24). The study used reverse genetics to generate virus which has the corresponding mutation A149T  
395 (A169T by our numbering) and showed that the single mutation alone resulted in glycosylation by  
396 electrophoresis(24). Also, the mutation was spontaneous and stable during the passage of the H7N1 viruses  
397 in turkeys, which suggests that the mutation can naturally occur during circulation in poultry species (24).  
398 There was no significant influence of the glycosylation site on host tropism, however, the potential change  
399 in antigenicity was not investigated (24). The latest study published in 2020 also verified that the  
400 corresponding mutation A151T (A169T by our numbering) occurred in one of the escaping mutants and  
401 proved that the mutation results in glycosylation(25). But both studies did not investigate its influence on

402 cross-reactivity to other H7 strains. The closest finding to our study was a study conducted by Zost that  
403 demonstrated a lysine to threonine mutation at residue 170 of H3 HA (corresponding to H7 HA169) resulted  
404 in a significant change in the glycosylation pattern at antigenic site B and antigenic mismatch to the parental  
405 virus (26). This was not limited to residue 169, the glycosylation at a separate location (H7 HA 141T),  
406 which also naturally occurs, hindered the access of the epitope to neutralizing antibodies (18). This motif  
407 was initially found at seven amino acids upstream to antigenic site A in the A/Netherlands/219/2003 H7  
408 HA (18). Similar to this study, introduction of the corresponding mutation into the A/Shanghai/2/2013 H7  
409 HA (identical HA sequence of Anhui/13) decreased the binding of specific monoclonal antibodies and  
410 facilitated HA-mediated entry of the virus(18). Our study identified that single amino mutation could  
411 significantly reduce the reactivity to the homologous strains, and it seems that there could be more signature  
412 mutations on H7 HAs, which can results in vaccine mismatch. H7 HA vaccine strategies should aim to  
413 identify more of such mutations and to cover such variants to prevent severe vaccine mismatches.

414         Since the human challenge study conducted in the 1970s, the 1:40 HAI titer has been used to predict  
415 vaccine effectiveness when an appropriate challenge study is not plausible, such as the annual flu vaccine  
416 approval process. (27-29). While the 1:40 1:40 HAI titer cut-off is sufficient to provide a rough prediction,  
417 the specificity of this prediction can be improved by increasing the HAI titer cut-off (28, 30). This is  
418 particularly true for subjects with higher revaccination risks, such as the elderly population (28, 30). Also,  
419 the cut-off should be optimized based on the format of testing antigen, as HAI titers by H7 VLPs that tend  
420 provide higher HAI titers in the HAI assay than assays using live viruses (Fig. 3). Thus, we applied ROC  
421 analysis to optimize the H7 VLP HAI titer cut-off to predict protection of antibodies elicited by H7 HA  
422 vaccinations (30). The adjusted cut-off, 1:80 HAI unit, was more useful to predict protection against weight  
423 loss following Anhui/13 challenge than the 1:40 HAI titer.

424         Serum HAI titer only reflects the protection mediated by the receptor blocking antibodies.  
425 Influenza virus vaccines confer protection via diverse mechanisms, such as non-HAI antibodies or CD8+  
426 cytotoxic T cells(12, 31). Lung viral clearance may require multiple immune mechanisms, including

427 antibodies, cytokines, dendritic cells and different T cell populations. (32). Blocking viral infection is  
428 known to be mediated by diverse mechanisms, such as neutralizing antibodies targeting non-receptor  
429 binding sites(33). Until clear correlates of protection by non-HAI neutralizing antibodies or cell-mediated  
430 immune responses become available, the serum HAI titer will remain the most reliable indicator to evaluate  
431 influenza vaccine effectiveness.

432         One inherent limitation of this study was that the mouse model was used to extrapolate human  
433 antibody response to H7 HA immunization. Recent studies used ferrets as an alternative considering its  
434 high susceptibility to influenza virus, similar lung physiology and patterns of binding to sialic acid with  
435 human (34, 35). Still, for the antibody research, ferret model might not be as useful considering that the  
436 ferret immunology has not well identified and there is no evidence that the ferret antibody can emulate the  
437 epitope recognition by human's. Rather, mouse model has advantages in antibody research, such as better  
438 availability, genetic homogeneity (inbred), and availability of diverse immunologic assay tools. Future  
439 study on broadly reactive H7 HA as a vaccine candidate should be evaluated for its efficacy in ferret  
440 challenge model.

441         In conclusion, the data presented in this study demonstrated that the cross reactive antibodies are  
442 elicited among H7 HA proteins, but the HA sequences are not correlated with the phylogenetic proximity  
443 or geographic orientation of the influenza HA antigens. Key amino acid mutations at putative antigenic  
444 sites in the H7 HA proteins are important for elicitation of broadly H7-reactive antibodies. Future studies  
445 will focus on developing vaccines to cover all known H7Nx influenza virus strains and future variants with  
446 key mutations.

447

448 **Acknowledgements**

449 The authors would like to thank Amanada Skarlupka for technical assistance. Influenza viruses were provided by  
450 BEI resources (Manassas, VA, USA) and by Dr. Mark Tompkins (Athens, GA, USA) The authors would also like  
451 to thank the University of Georgia Animal Resource staff, technicians, and veterinarians for animal care and the staff  
452 of the Animal Health Research Center (AHRC) Biosafety Level 3 laboratories for providing biosafety and animal  
453 care. Also, the authors thank the members of the CVI protein production core, Jeffrey Ecker, Spencer Pierce, and  
454 Ethan Cooper, for providing technical assistance in purifying the recombinant proteins.

455

456 **Author Contributions**

457 Hyesun Jang - Conceptualization, Formal analysis, Methodology, Writing

458 Ted M. Ross – Conceptualization, Funding acquisition, Methodology, Writing/Editing

459

460 **Competing Interests**

461 There is no competing interested in this study.

462

463 **Funding Information**

464 This work was funded, in part, by the U.S. NIH/NIAID Collaborative Influenza Vaccine Innovation Centers  
465 (CIVICs) contract 75N93019C00052 and by the University of Georgia (UGA) (UGA-001). In addition,

466 TMR is supported by the Georgia Research Alliance as an Eminent Scholar.

## 467 **References**

- 468 1. Lam TT, Zhou B, Wang J, Chai Y, Shen Y, Chen X, et al. Dissemination, divergence and  
469 establishment of H7N9 influenza viruses in China. *Nature*. 2015;522(7554):102-5.
- 470 2. Shi J, Deng G, Ma S, Zeng X, Yin X, Li M, et al. Rapid Evolution of H7N9 Highly Pathogenic Viruses  
471 that Emerged in China in 2017. *Cell Host Microbe*. 2018;24(4):558-68.e7.
- 472 3. Sutton TC. The Pandemic Threat of Emerging H5 and H7 Avian Influenza Viruses. *Viruses*.  
473 2018;10(9):461.
- 474 4. Yu D, Xiang G, Zhu W, Lei X, Li B, Meng Y, et al. The re-emergence of highly pathogenic avian  
475 influenza H7N9 viruses in humans in mainland China, 2019. *Euro surveillance : bulletin European sur les*  
476 *maladies transmissibles = European communicable disease bulletin*. 2019;24(21):1900273.
- 477 5. Hatta M, Zhong G, Gao Y, Nakajima N, Fan S, Chiba S, et al. Characterization of a Feline Influenza  
478 A(H7N2) Virus. *Emerg Infect Dis*. 2018;24(1):75-86.
- 479 6. Belser JA, Blixt O, Chen L-M, Pappas C, Maines TR, Van Hoeven N, et al. Contemporary North  
480 American influenza H7 viruses possess human receptor specificity: Implications for virus transmissibility.  
481 *Proceedings of the National Academy of Sciences*. 2008;105(21):7558.
- 482 7. Belser JA, Pulit-Penalosa JA, Sun X, Brock N, Pappas C, Creager HM, et al. A Novel A(H7N2)  
483 Influenza Virus Isolated from a Veterinarian Caring for Cats in a New York City Animal Shelter Causes  
484 Mild Disease and Transmits Poorly in the Ferret Model. *Journal of virology*. 2017;91(15):e00672-17.
- 485 8. Naguib MM, Verhagen JH, Mostafa A, Wille M, Li R, Graaf A, et al. Global patterns of avian  
486 influenza A (H7): virus evolution and zoonotic threats. *FEMS Microbiology Reviews*. 2019;43(6):608-21.
- 487 9. Zoonotic influenza viruses: antigenic and genetic characteristics and development of candidate  
488 vaccine viruses for pandemic preparedness. *Releve epidemiologique hebdomadaire*. 2017;92(42):633-  
489 47.
- 490 10. Dong J, Chen P, Wang Y, Lv Y, Xiao J, Li Q, et al. Evaluation of the immune response of a H7N9  
491 candidate vaccine virus derived from the fifth wave A/Guangdong/17SF003/2016. *Antiviral research*.  
492 2020;177:104776.
- 493 11. Krammer F, Albrecht RA, Tan GS, Margine I, Hai R, Schmolke M, et al. Divergent H7 Immunogens  
494 Offer Protection from H7N9 Virus Challenge. *Journal of virology*. 2014;88(8):3976.
- 495 12. Stadlbauer D, Rajabhathor A, Amanat F, Kaplan D, Masud A, Treanor JJ, et al. Vaccination with a  
496 Recombinant H7 Hemagglutinin-Based Influenza Virus Vaccine Induces Broadly Reactive Antibodies in  
497 Humans. *mSphere*. 2017;2(6):e00502-17.
- 498 13. Guo L, Wang D, Zhou H, Wu C, Gao X, Xiao Y, et al. Cross-reactivity between avian influenza A  
499 (H7N9) virus and divergent H7 subtypic- and heterosubtypic influenza A viruses. *Scientific reports*.  
500 2016;6:22045-.
- 501 14. Carter DM, Darby CA, Lefoley BC, Crevar CJ, Alefantis T, Oomen R, et al. Design and  
502 Characterization of a Computationally Optimized Broadly Reactive Hemagglutinin Vaccine for H1N1  
503 Influenza Viruses. *Journal of virology*. 2016;90(9):4720.
- 504 15. Huang Y, Owino SO, Crevar CJ, Carter DM, Ross TM. N-Linked Glycans and K147 Residue on  
505 Hemagglutinin Synergize To Elicit Broadly Reactive H1N1 Influenza Virus Antibodies. *Journal of virology*.  
506 2020;94(6):e01432-19.
- 507 16. Matrosovich M, Matrosovich T, Garten W, Klenk HD. New low-viscosity overlay medium for viral  
508 plaque assays. *Virology journal*. 2006;3:63.
- 509 17. Unal I. Defining an Optimal Cut-Point Value in ROC Analysis: An Alternative Approach.  
510 *Computational and Mathematical Methods in Medicine*. 2017;2017:3762651.
- 511 18. Alvarado-Facundo E, Vassell R, Schmeisser F, Weir JP, Weiss CD, Wang W. Glycosylation of  
512 Residue 141 of Subtype H7 Influenza A Hemagglutinin (HA) Affects HA-Pseudovirus Infectivity and  
513 Sensitivity to Site A Neutralizing Antibodies. *PloS one*. 2016;11(2):e0149149-e.



- 514 19. Liu D, Shi W, Shi Y, Wang D, Xiao H, Li W, et al. Origin and diversity of novel avian influenza A  
515 H7N9 viruses causing human infection: phylogenetic, structural, and coalescent analyses. *The Lancet*.  
516 2013;381(9881):1926-32.
- 517 20. Gao R, Cao B, Hu Y, Feng Z, Wang D, Hu W, et al. Human infection with a novel avian-origin  
518 influenza A (H7N9) virus. *The New England journal of medicine*. 2013;368(20):1888-97.
- 519 21. Habibzadeh F, Habibzadeh P, Yadollahie M. On determining the most appropriate test cut-off  
520 value: the case of tests with continuous results. *Biochem Med (Zagreb)*. 2016;26(3):297-307.
- 521 22. Schmeisser F, Vasudevan A, Verma S, Wang W, Alvarado E, Weiss C, et al. Antibodies to  
522 antigenic site A of influenza H7 hemagglutinin provide protection against H7N9 challenge. *PLoS one*.  
523 2015;10(1):e0117108-e.
- 524 23. Joseph T, McAuliffe J, Lu B, Jin H, Kemble G, Subbarao K. Evaluation of Replication and  
525 Pathogenicity of Avian Influenza A H7 Subtype Viruses in a Mouse Model. *Journal of Virology*.  
526 2007;81(19):10558.
- 527 24. Iqbal M, Essen SC, Xiao H, Brookes SM, Brown IH, McCauley JW. Selection of variant viruses  
528 during replication and transmission of H7N1 viruses in chickens and turkeys. *Virology*. 2012;433(2):282-  
529 95.
- 530 25. Chang P, Sealy JE, Sadeyen J-R, Bhat S, Lukosaityte D, Sun Y, et al. Immune Escape Adaptive  
531 Mutations in the H7N9 Avian Influenza Hemagglutinin Protein Increase Virus Replication Fitness and  
532 Decrease Pandemic Potential. *Journal of Virology*. 2020;94(19):e00216-20.
- 533 26. Zost SJ, Parkhouse K, Gumina ME, Kim K, Diaz Perez S, Wilson PC, et al. Contemporary H3N2  
534 influenza viruses have a glycosylation site that alters binding of antibodies elicited by egg-adapted  
535 vaccine strains. *Proceedings of the National Academy of Sciences*. 2017;114(47):12578.
- 536 27. Wood JM, Levandowski RA. The influenza vaccine licensing process. *Vaccine*. 2003;21(16):1786-  
537 8.
- 538 28. Coudeville L, Bailleux F, Riche B, Megas F, Andre P, Ecochard R. Relationship between  
539 haemagglutination-inhibiting antibody titres and clinical protection against influenza: development and  
540 application of a bayesian random-effects model. *BMC Medical Research Methodology*. 2010;10(1):18.
- 541 29. Hobson D, Curry RL, Beare AS, Ward-Gardner A. The role of serum haemagglutination-inhibiting  
542 antibody in protection against challenge infection with influenza A2 and B viruses. *J Hyg (Lond)*.  
543 1972;70(4):767-77.
- 544 30. Benoit A, Beran J, Devaster J-M, Esen M, Launay O, Leroux-Roels G, et al. Hemagglutination  
545 Inhibition Antibody Titers as a Correlate of Protection Against Seasonal A/H3N2 Influenza Disease. *Open*  
546 *Forum Infect Dis*. 2015;2(2):ofv067-ofv.
- 547 31. Tan GS, Leon PE, Albrecht RA, Margine I, Hirsh A, Bahl J, et al. Broadly-Reactive Neutralizing and  
548 Non-neutralizing Antibodies Directed against the H7 Influenza Virus Hemagglutinin Reveal Divergent  
549 Mechanisms of Protection. *PLOS Pathogens*. 2016;12(4):e1005578.
- 550 32. Schmidt ME, Varga SM. The CD8 T Cell Response to Respiratory Virus Infections. *Frontiers in*  
551 *immunology*. 2018;9:678-.
- 552 33. Giancchetti E, Torelli A, Montomoli E. The use of cell-mediated immunity for the evaluation of  
553 influenza vaccines: an upcoming necessity. *Human vaccines & immunotherapeutics*. 2019;15(5):1021-  
554 30.
- 555 34. Belser JA, Katz JM, Tumpey TM. The ferret as a model organism to study influenza A virus  
556 infection. *Dis Model Mech*. 2011;4(5):575-9.
- 557 35. Oh DY, Hurt AC. Using the Ferret as an Animal Model for Investigating Influenza Antiviral  
558 Effectiveness. *Frontiers in Microbiology*. 2016;7(80).

Fig 8

(A)

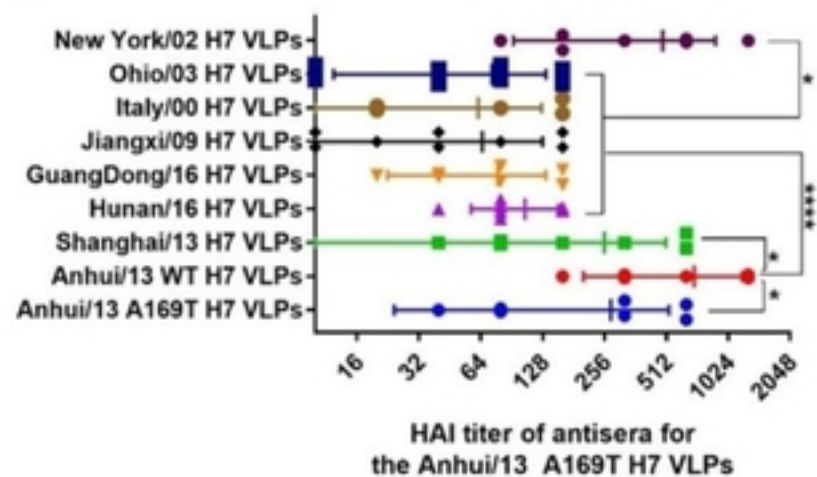

(B)

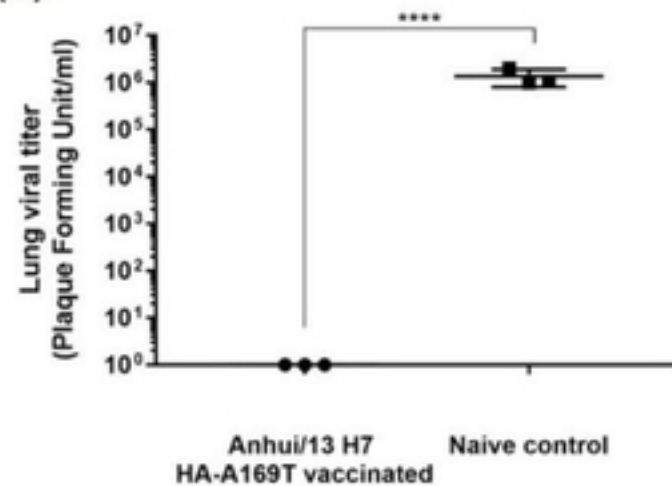

(C)

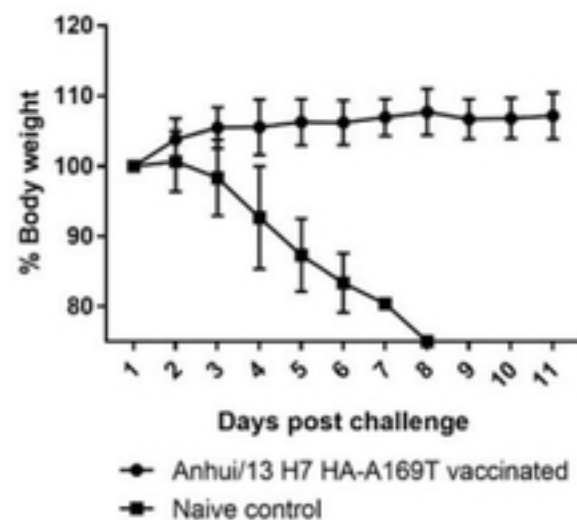

(D)

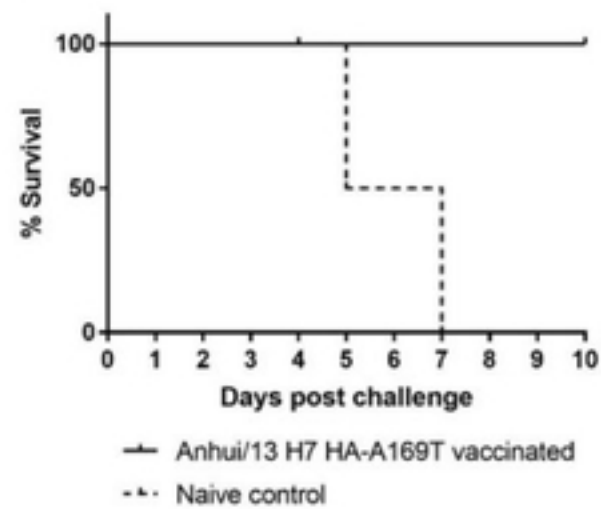

Fig 7

(A)

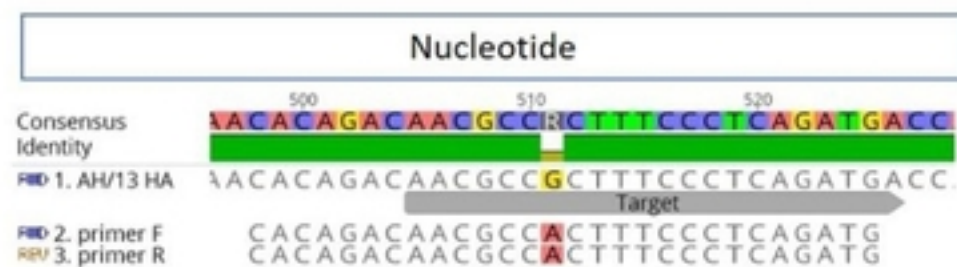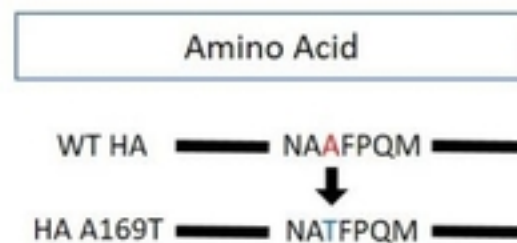

(C)

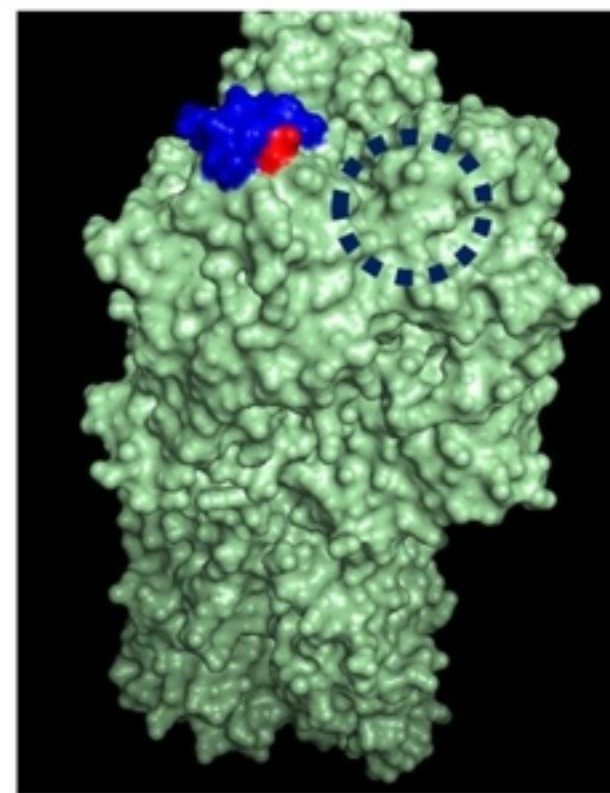

(B)

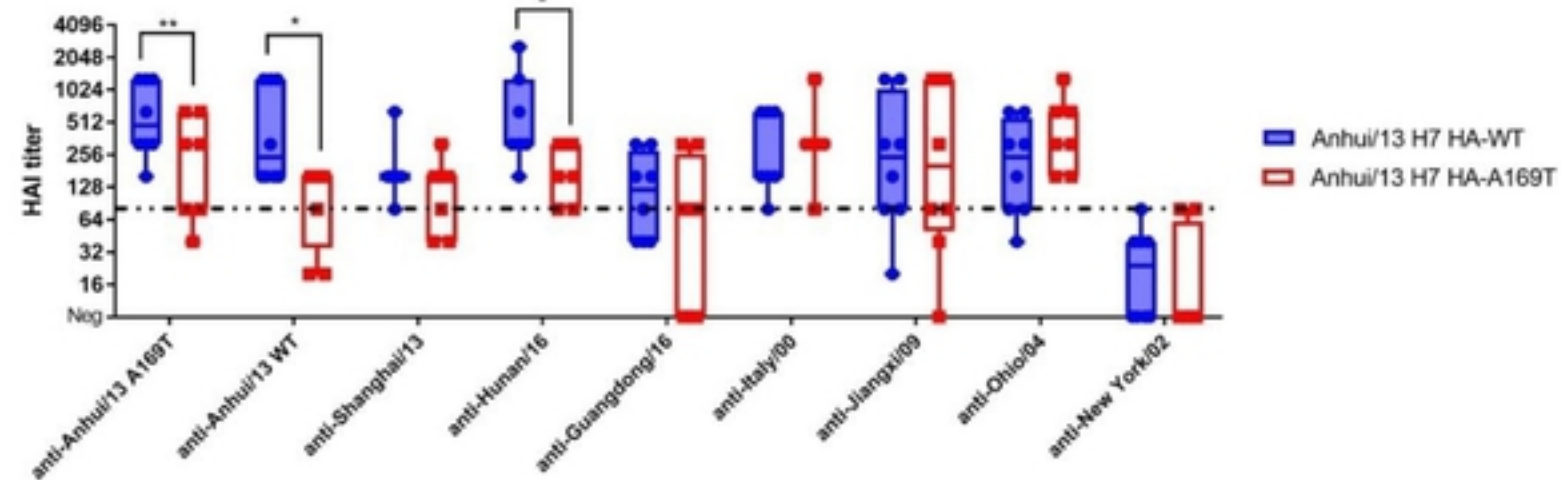

Fig 6

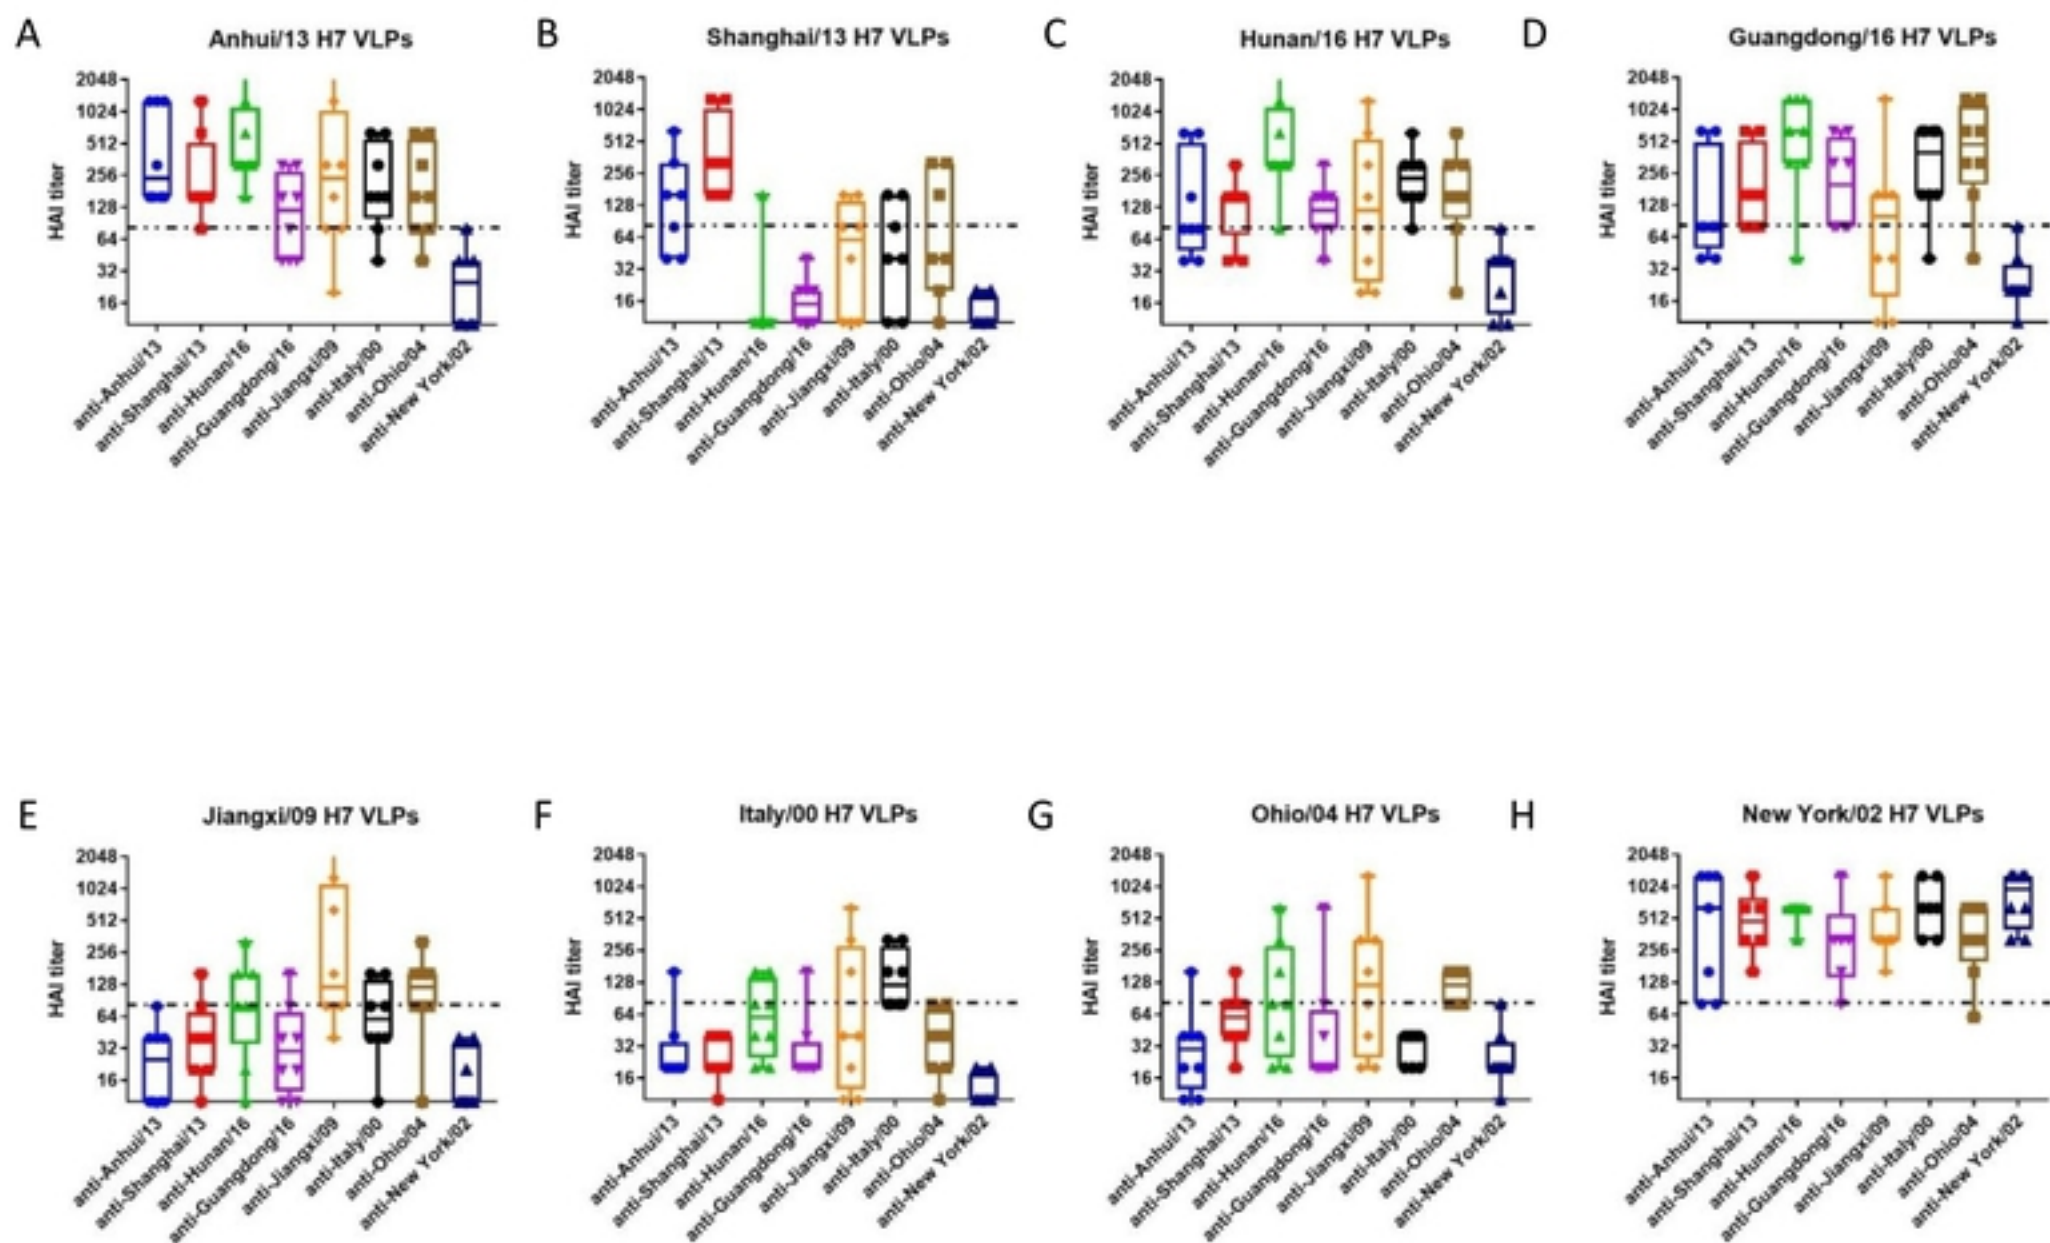

Fig 5

(A)

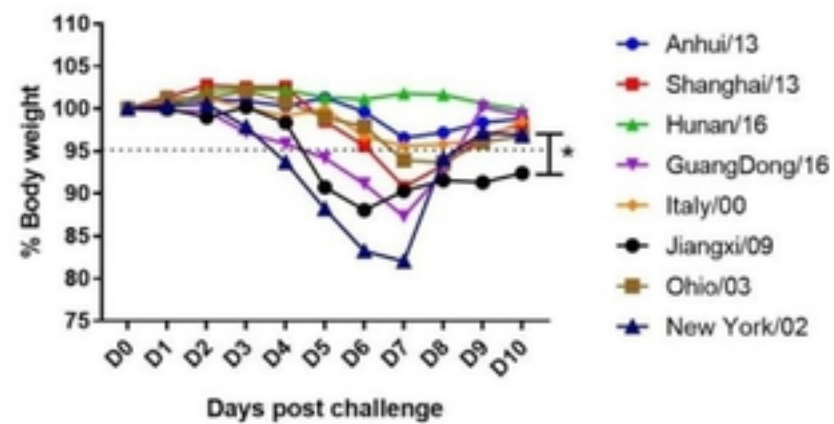

(B)

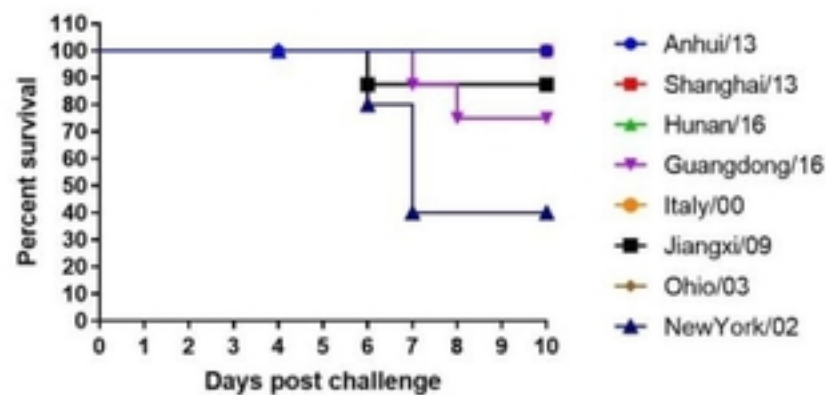

(C)

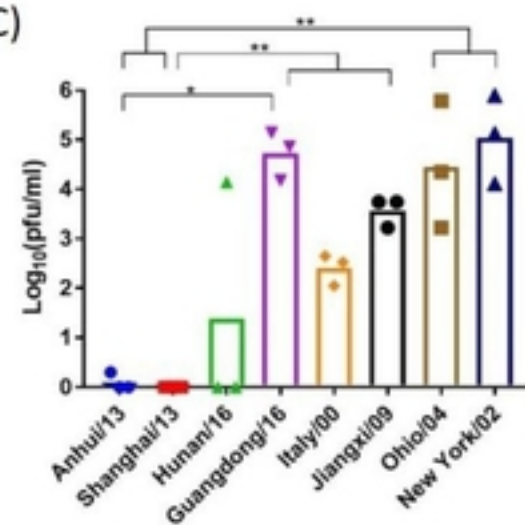

Fig 4

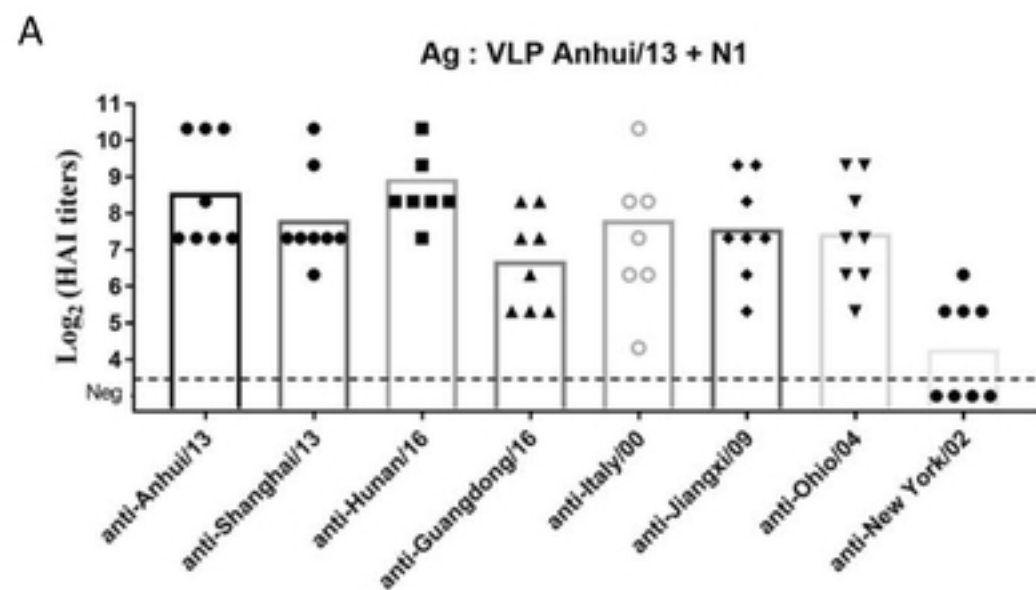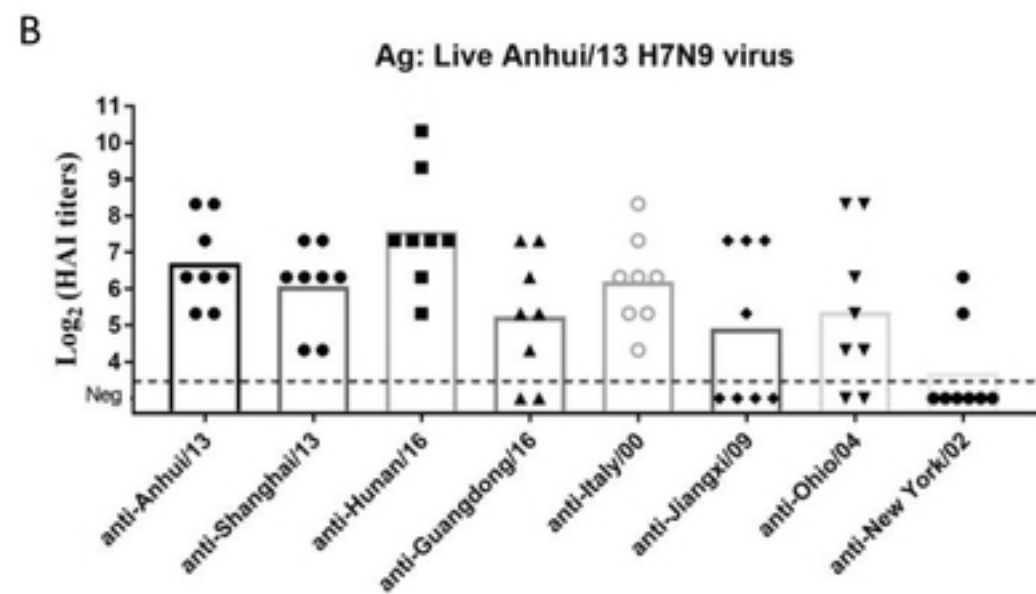

(A) All H7 HA1 sequences between 2000-2020

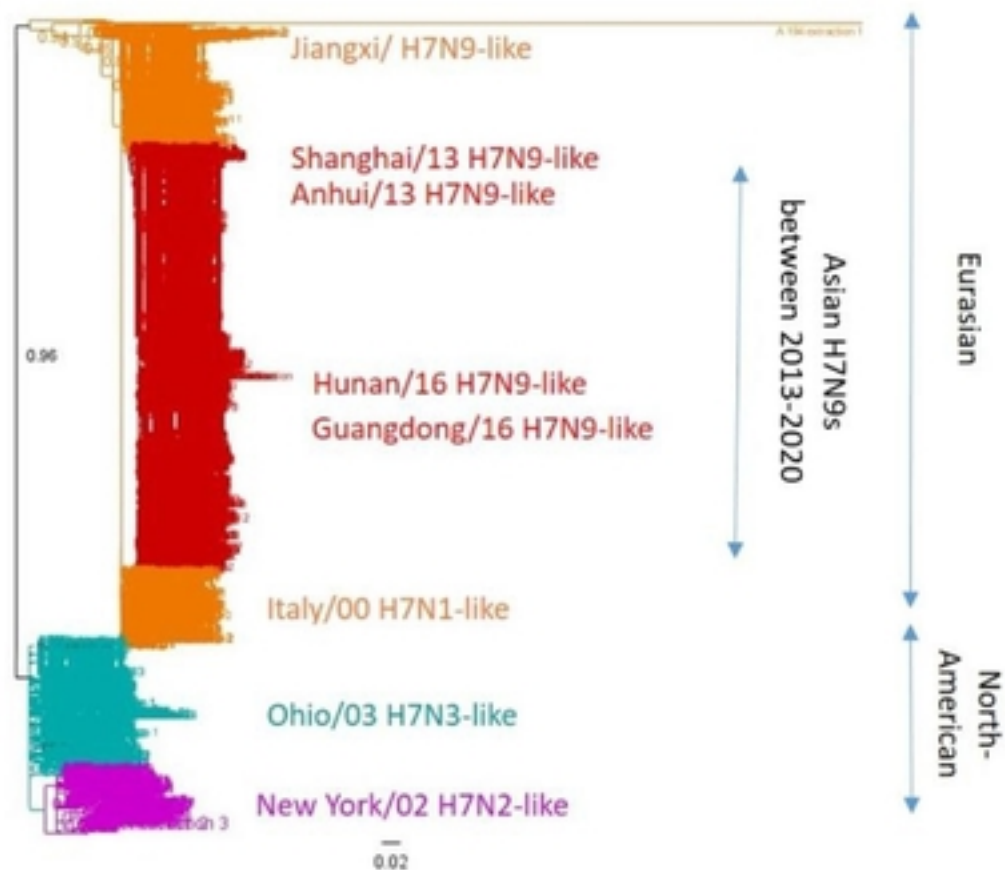

(B) Selected H7 strains

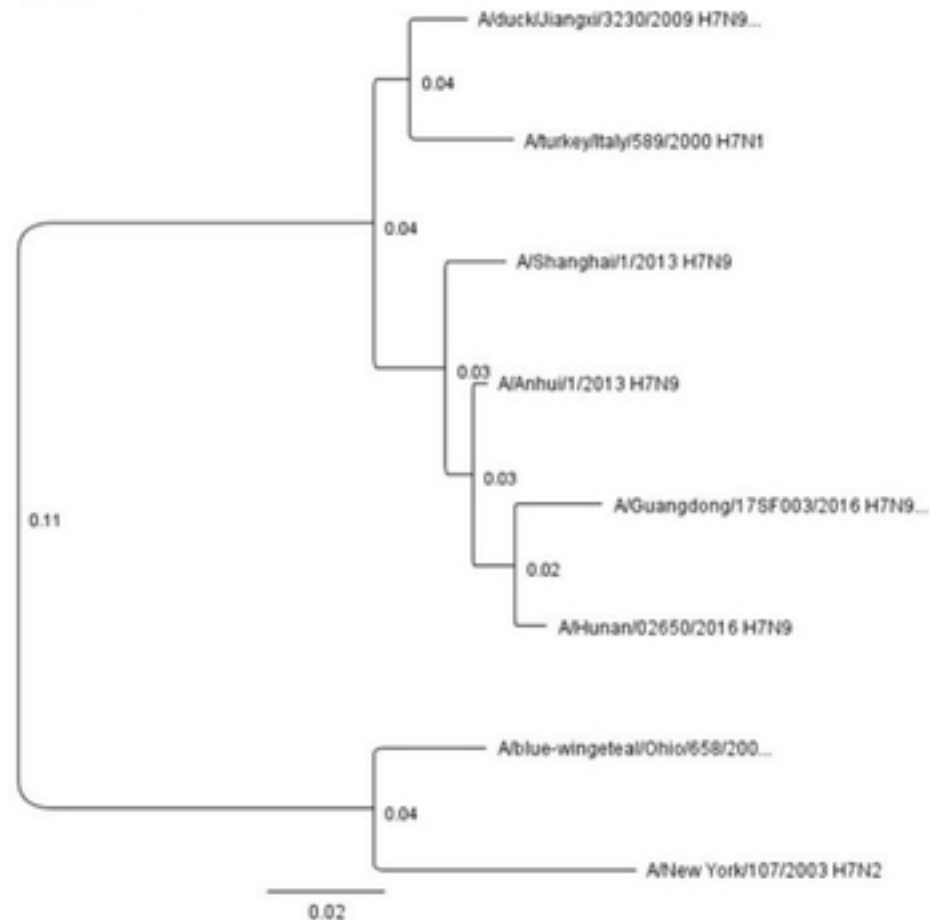

Fig 2

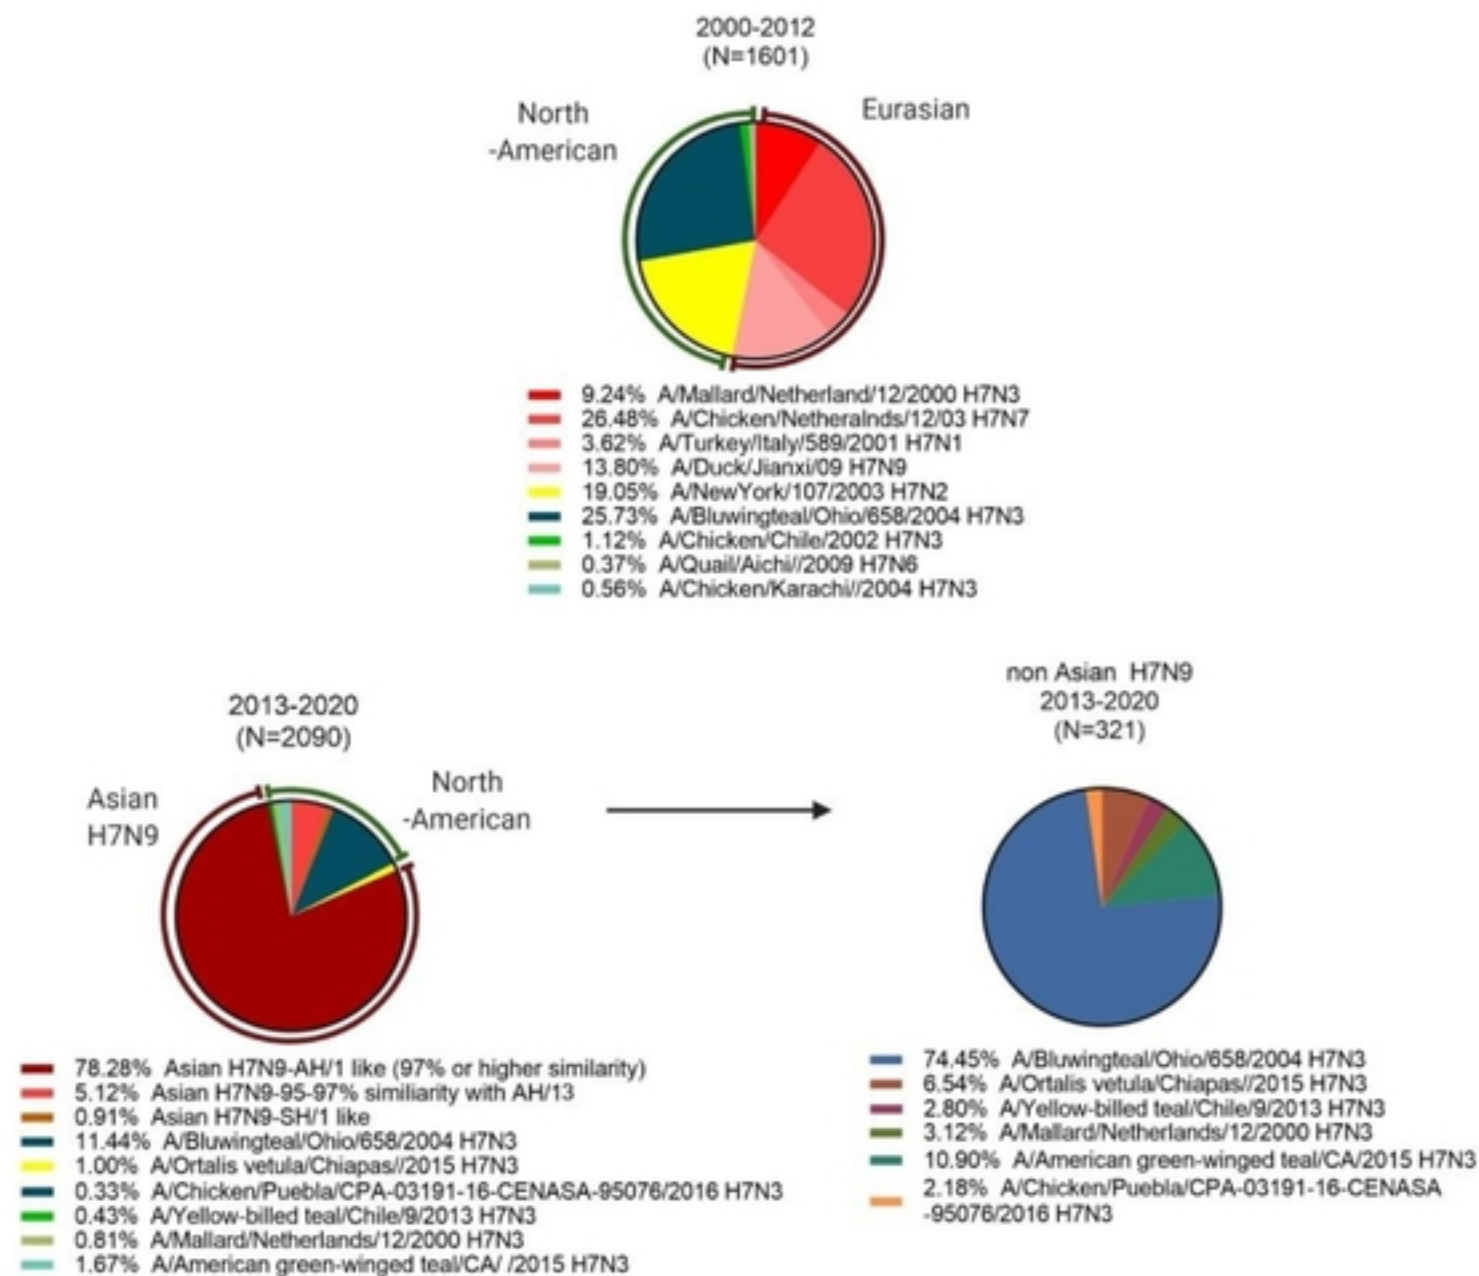



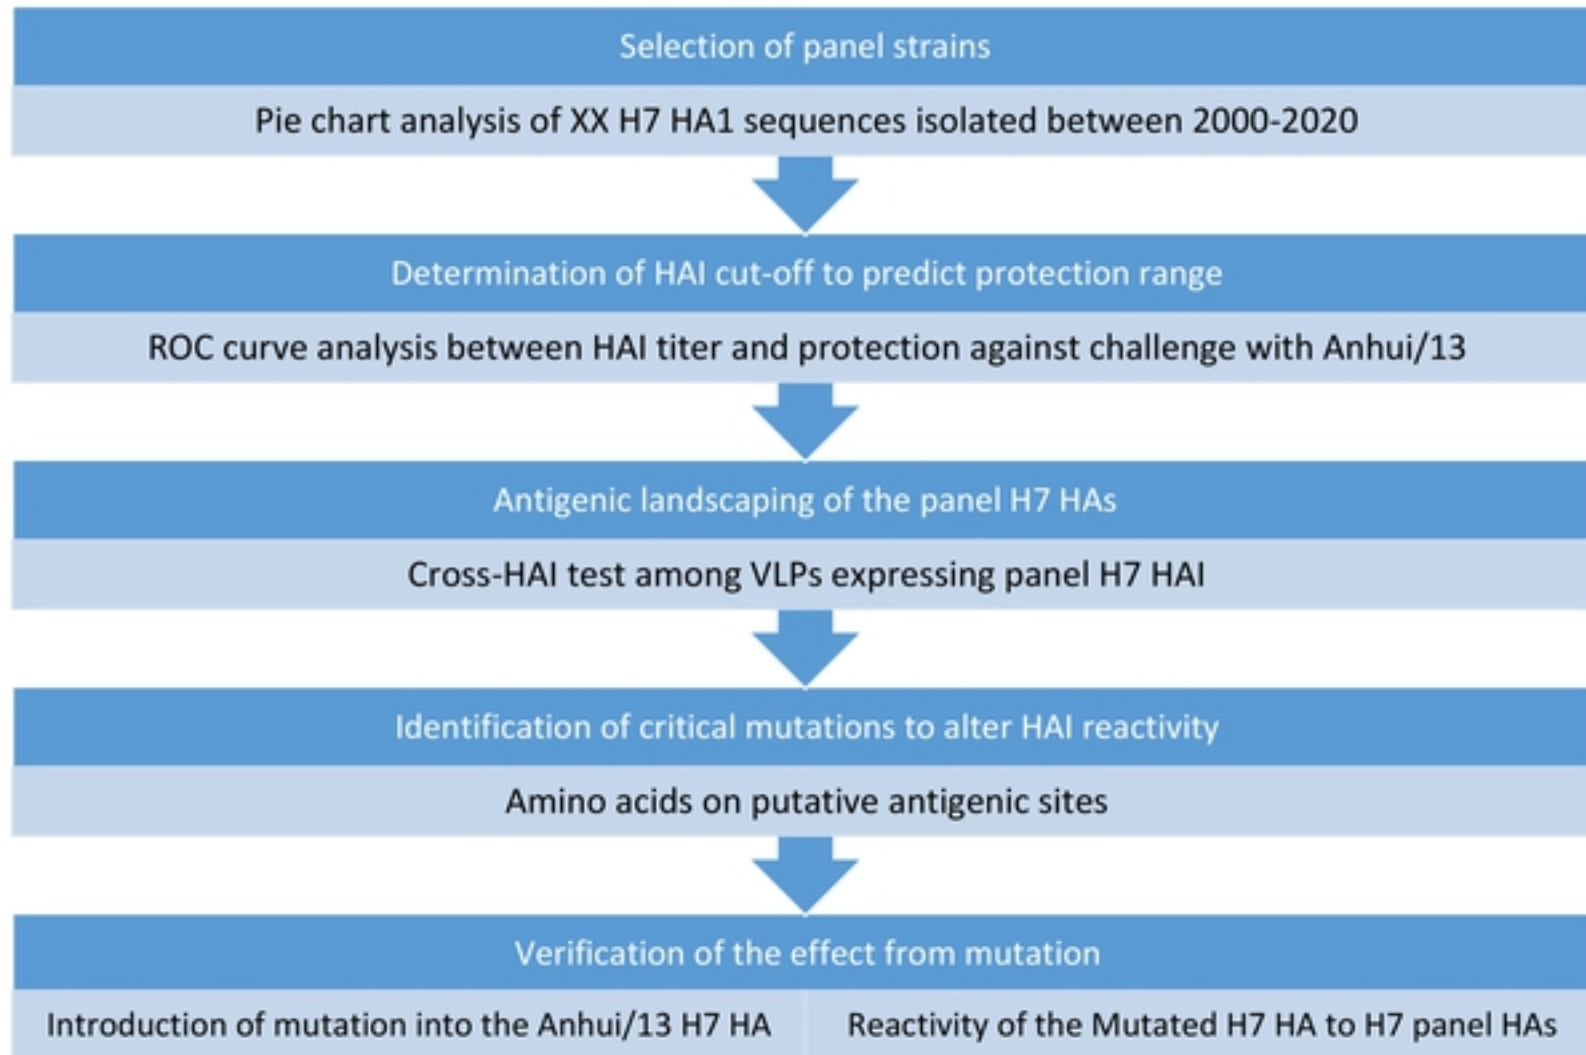

Source: http://biorxiv.org/content/10.1101/2021.01.25.428062v1.full.pdf
